# Supplementary material
Source: HighWire-hosted journal article supplement (https://diabetes.diabetesjournals.org/content/suppl/2006/11/28/55.12.3611)
Supplement: PG3611table1.pdf [file PG3611table1.pdf]

Supplementary Table 1.

| Marker           | Position        | Primer F                           | Primer R                           | Comparison     |
|------------------|-----------------|------------------------------------|------------------------------------|----------------|
| <b>D11Mit340</b> | <b>23133495</b> | <b>CTCAGAAAGCGTCAAGGTCC</b>        | <b>CTTTCTGACCTCTGAGATAATCTGC</b>   | <b>NOD#NOR</b> |
| <b>D11Mit230</b> | <b>27895981</b> | <b>ACAAAATGTCACTCTGAAATGCC</b>     | <b>TTGTCAGGGAAGGTGAGACC</b>        | <b>NOD#NOR</b> |
| <b>D11Mit135</b> | <b>33561320</b> | <b>GCATCTGCAGAGGAGGTTTC</b>        | <b>AAATGGAATTTAGTAAATGGGAAGG</b>   | <b>NOD#NOR</b> |
| <b>D11Mit51</b>  | <b>36185781</b> | <b>CCAAACAGGGTCTGTTTTATTC</b>      | <b>TAACAGGGTGAGTTTGTGAAACA</b>     | <b>NOD#NOR</b> |
| <b>D11Mit217</b> | <b>37327471</b> | <b>ACTGGAAAATATGTTTTAAACCTCTG</b>  | <b>AAATGGGATTCTGCAAAAACC</b>       | <b>NOD#NOR</b> |
| <b>D11Mit310</b> | <b>53927607</b> | <b>GTGCACTTTCCATGCCTGTA</b>        | <b>GAGTAGAAAGAGACAGAGAAAGACACA</b> | <b>NOD#NOR</b> |
| <b>D11Mit164</b> | <b>56726033</b> | <b>TCTGAGCAAATAAAGTGAAAGGG</b>     | <b>TCGGGGGATAGAAGAATGC</b>         | <b>NOD#NOR</b> |
| <b>D11Mit157</b> | <b>61718110</b> | <b>GATTATCTACACCACATCCTATAAGCC</b> | <b>CCAGTACTTTGGTGATCACTTGG</b>     | <b>NOD#NOR</b> |
| <b>D11Mit177</b> | <b>64938396</b> | <b>GTAATGGTTATCACAGGAAGTTTGG</b>   | <b>ACCCAGTCTGCAACATAACC</b>        | <b>NOD#NOR</b> |
| <b>D11Mit113</b> | <b>66275797</b> | <b>AACACACAGGTATGTGTGCACA</b>      | <b>GGCGCAATTATCAGGTG</b>           | <b>NOD#NOR</b> |
| <b>D11Mit4</b>   | <b>68334899</b> | <b>CAGTGGGTCTCAGTACAGCA</b>        | <b>AAGCCAGCCAGTCTTCATA</b>         | <b>NOD#NOR</b> |
| <b>D11Mit368</b> | <b>68764602</b> | <b>AGAATTCCTTCTGCAACTGC</b>        | <b>CGCTGTAATCTAGCCTTCA</b>         | <b>NOD#NOR</b> |
| D11Gul2418       | 68839619        | CTACCAGACACCATCTCCC                | TCTTCCTTTTTGGCACACC                | NOD#NOR        |
| D11Gul2420       | 68849219        | CCTCCTCCGGCTTACG                   | CTATGACGCTCCGCCC                   | NOD=NOR        |
| D11Gul2423       | 68875931        | AACAAACTGTGCAAACTGG                | CCCTAGAGTTTCTTAGCGC                | NOD=NOR        |
| D11Gul2427       | 68887507        | GTGCAGAATTTCCACTTGC                | TGAACCTCACCTGGCATGC                | NOD#NOR        |
| D11Gul2437       | 68971615        | ATTTGTGGAATCCTGCTGC                | TGGATCAGTCTCAAGCAACC               | NOD#NOR        |
| D11Gul2446       | 69056367        | GAGTGCTGCAGAAATCATGG               | GACTGGTTCATGAGGCAAGG               | NOD#NOR        |
| D11Gul2447       | 69076926        | GCCTGTGTACGTTCCAC                  | TGACCAACACAACCTCCG                 | NOD#NOR        |
| D11Gul2451       | 69095641        | TTAGTGACACAGATTAATACATTTTCC        | TGAGCATGAGTACTGATTAATACCC          | NOD#NOR        |
| <b>D11Mit298</b> | <b>69252004</b> | <b>TAGGCATGGTGGTACATACCTT</b>      | <b>GGTCTCACTATGTAAGCCCTGGT</b>     | <b>NOD#NOR</b> |
| D11Gul2481       | 69297127        | TGCATGAAGCCTTATGTCCC               | CATTCTGCAGCTCAGAGTGG               | NOD#NOR        |
| D11Gul2483       | 69323180        | CTGTGCAGGAAGATGGTAGC               | AACCTTAGGCATTCAAGGC                | NOD=NOR        |
| D11Gul2484       | 69338738        | GAGTAAAGAAATTGGAGGCTGG             | TGAGTCTCACTATGCAGCCC               | NOD=NOR        |
| D11Gul2486       | 69346195        | CACACACCTTTGACCCTAGC               | GCTGTCTGTGCAGTTGTGC                | NOD=NOR        |
| D11Gul2493       | 69440095        | CAACACCCCTTTCTCACCC                | AGACAGGTGCTGACTTCTGC               | NOD=NOR        |
| D11Gul2502       | 69476875        | GTGTGTATGTGTGAAGCTGGC              | AAGGATATAAGGACCTCATGTGG            | NOD=NOR        |
| D11Gul2505       | 69492415        | TTGTTTTCTGCATAGCTGGC               | CATCAGGACGACAGAAATGG               | NOD=NOR        |
| <b>D11Mit30</b>  | <b>69519643</b> | <b>GCTGTGAACAAGTAGGGTC</b>         | <b>CCGTCAATTGCTAAAGGGAAG</b>       | <b>NOD#NOR</b> |
| D11Gul2518       | 69533455        | TGCTGAGTCCCTCAAGTCC                | TCCATATCTCCAGTTCGAAGG              | NOD#NOR        |
| D11Gul2522       | 69557395        | AGGCAGCAGAGTATCATGACC              | TCCACTCTACGCCTTCCC                 | NOD#NOR        |
| D11Gul2523       | 69567835        | CCTTTTTGAAGCAGGTCTCC               | GACCTCTGTGAGTTCACGGC               | NOD=NOR        |
| D11Gul2524       | 69569515        | ATGTGCTTGCCCCACT                   | ACCCAAATGGATTCTTCTAAC              | NOD=NOR        |
| D11Gul2525       | 69581755        | GCAAAACCCCTTGTGGGTA                | GGGCAGAGTGTGAGTGTCTAA              | NOD#NOR        |
| D11Gul2526       | 69583315        | AGTGCCCTCCACCACCTA                 | TTGAGCGCATGTTCTGATTG               | NOD#NOR        |
| D11Gul2527       | 69589573        | GCAACAGAAAAGATAGCAGCA              | CATGGCCAAGATGAGAGAAA               | NOD=NOR        |
| D11Gul2528       | 69596384        | TTGATAGCTAGTCTTTGGGTGGT            | GCAGTGGGAACAGTGTATC                | NOD#NOR        |
| D11Gul2529       | 69598544        | CTCAGGTCGGATATCTTATAGCA            | AAGATTCTGTATGCGACAGTAC             | NOD=NOR        |
| D11Gul2531       | 69618252        | CCTCCTCCCATGCATTACA                | AGTGCTGTCTGTGCTGTCTATC             | NOD#NOR        |
| D11Gul2533       | 69619512        | CATGTGACCCCTGTCTCAAAAA             | ACAGAAGAGAAAACCTGCCT               | NOD#NOR        |
| D11Gul2534       | 69654965        | ACCCGAGAAGTACATAGTGC               | GAGCAGCCAGTATGCTTAACC              | NOD=NOR        |
| D11Gul2535       | 69674039        | GGTAGCGGTAACCTCCAGCAG              | GGAGCCTAACGTGGGAACCTA              | NOD#NOR        |
| D11Gul2536       | 69678781        | TGAAAGATGTGGGATTGTGG               | ACTTTCAGTTCCTTGTCTGG               | NOD=NOR        |
| D11Gul2537       | 69684175        | ACCCAATCAATTATCACCCAG              | TGATGTACGAAAACCTACCAACTG           | NOD#NOR        |
| D11Gul2538       | 69689695        | CTACTGGGCTCCAAGGGTC                | TCTGCTCTTCTGCATTTTTA               | NOD#NOR        |
| D11Gul2539       | 69742114        | AGCAGTCAAGTCTTTTAACCC              | TGTGTTCACTCCAGTGTCC                | NOD#NOR        |
| D11Gul2560       | 69834962        | TTTTGTGGGACACTAAGCAGG              | CCACTTCTTAAGTGAGCTGTAGC            | NOD#NOR        |
| D11Gul2583       | 69960388        | TGTAGAGCGAGGGTATGGG                | AACTGGTATCAGACACCTGGG              | NOD#NOR        |
| D11Gul2602       | 70051125        | GCAAACCATGCCATACCC                 | TTCTTGTCTGCACTCCC                  | NOD#NOR        |
| D11Gul2616       | 70105360        | CTTACACAGCAATGGGAATAGC             | TGAGTCTCTATGGATTTTGGC              | NOD#NOR        |
| D11Gul2622       | 70137385        | CAGTGAGCTAAATCCTGGTCC              | AAATCTCCTTCTCCATGCC                | NOD#NOR        |
| D11Gul2625       | 70173212        | GTTTTCTCCTCAGCTATCTGG              | AGAGCAAGCAGAAAACAGGC               | NOD#NOR        |
| D11Gul2629       | 70204048        | ACTCACATGCACCCACTCC                | TTGGTTTAGTCAAGTTCAAGGG             | NOD#NOR        |
| <b>D11Mit90</b>  | <b>70225299</b> | <b>TCTCCAGCCCTTCATTATG</b>         | <b>TGCCAAAACCCATGAGAC</b>          | <b>NOD#NOR</b> |
| D11Gul2634       | 70236743        | AATCTGTGCTCTCAAGGAAGC              | TCCCAGAACACATACACATGG              | NOD#NOR        |
| D11Gul2636       | 70260743        | AGTGCTGTTATGGTCATGG                | TTACCTGATGTTAACCTTGGC              | NOD#NOR        |
| D11Gul2647       | 70352003        | GTTACTCAGTCCCTCAAGATGGG            | GATTCCTGTCTGTCTTCTGC               | NOD=NOR        |
| D11Gul2657       | 70418600        | CATCTTTTTCTTCTGGACTATAGC           | TCTTTGGGTTCTGTGGGC                 | NOD#NOR        |
| D11Gul2671       | 70487563        | ATGCACACAGATCAATGG                 | CCTGCATAAAAACAGTGGCC               | NOD#NOR        |
| D11Gul2694       | 70756212        | CCCTCTCTTACCATGTCCC                | AGCCATATTTGAGGTATCTCG              | NOD#NOR        |
| D11Gul2695       | 70822815        | CACAGCTCTAGTTCCTGGGA               | AAGGCGTCTCACATAGCATC               | NOD#NOR        |
| D11Gul2700       | 70869799        | CCACCCCATGTAATAGCATAG              | TCTCTGAATGATGAGGCAT                | NOD#NOR        |
| D11Gul2712       | 70951613        | GCAACTTGGCCTACTGC                  | TGGCTCTCCCATGTAAGC                 | NOD=NOR        |
| D11Gul2721       | 71063266        | TTTGAAGTCAACCCACTTCTG              | TGTACTTCTAAAAGGCTTCTGAG            | NOD#NOR        |
| D11Gul2726       | 71081875        | AAATGGGATAGAGGCCCTTA               | GTAGGTACACATATCTCCACATG            | NOD#NOR        |
| D11Gul2731       | 71117814        | GGTGTATTAGATTCCTCGAA               | AACCAGCACAATGTCTTAAGAC             | NOD#NOR        |
| D11Gul2736       | 71172686        | TCCATGACAGAACAGAGAAAACA            | TCTGTCCAGGTCAACCACTACTC            | NOD#NOR        |
| D11Gul2741       | 71200342        | ACCACCCAGCAGCTTAATTT               | TTATTAGCCATGGGTTCA                 | NOD#NOR        |
| D11Gul2746       | 71253897        | AGAGAAGGAGCAGGCCAG                 | GCATACATGTGTGGGAGCA                | NOD#NOR        |
| D11Gul2751       | 71261946        | CGCATCTGCATCTTAAAGC                | AGTGGCAGCATACAGGCAT                | NOD#NOR        |
| D11Gul2756       | 71291045        | GAAGACAGCTCTGATTTCTCTCA            | AGTAAGGATGACCCAGAAAACA             | NOD#NOR        |
| D11Gul2761       | 71334485        | GAGGTCTCACCCAGGAAGA                | ACCTTAGTTACCTTCTGGATCC             | NOD#NOR        |
| D11Gul2766       | 71364309        | GGCTCTAGTTGTAGCTATCAGAG            | GACATTTCCAGAGAAAAGG                | NOD#NOR        |
| D11Gul2850       | 71743207        | ACGCTAATTGCCAGGTAGG                | AAGTTCAAGTTCAAGTGTGAGAGCC          | NOD#NOR        |

|                  |                 |                                   |                                   |                    |
|------------------|-----------------|-----------------------------------|-----------------------------------|--------------------|
| D11Gul2879       | 71924554        | CTACTCCAGTGACCAATATTTTACC         | GACGTTCTGAACCAAGGGC               | NOD=NOR            |
| D11Gul2883       | 71939854        | GCCGATTTCCAGCATCAT                | TTGGAACAGGGGCTCATT                | NOD#NOR            |
| D11Gul2887       | 71948314        | TTTTCTGGCCCCCTTTATACC             | GAAGCCACAGTAAAACTCTGG             | NOD#NOR            |
| <b>D11Mit364</b> | <b>71958449</b> | <b>TTGGGTGCCCTTAATCTCTG</b>       | <b>GAGCAAGGTCAAGTAAAGTAGAATTG</b> | <b>NOD#NOR</b>     |
| D11Gul2899       | 71998548        | AGCAGAGTGAAGAGCTACAATAGG          | CTCAAATTTATGGTCTTCCCG             | NOD#NOR            |
| <b>D11Mit219</b> | <b>72044462</b> | <b>TTGTATGTATAGATGCATTTGAATGG</b> | <b>GGTTTGTATAAATTTCACTCTGTGC</b>  | <b>NOD#NOR</b>     |
| D11Gul2907       | 72066941        | GAACCCGGTTCCACTCC                 | CCTGGGCTACATAGTGAGGC              | NOD#NOR            |
| D11Gul2917       | 72103599        | AATTCAGCAACCACATGG                | CCAGGCTTCTGATCTCTTCC              | NOD=NOR            |
| D11Jyh522        | 72136258        | TGCAACATGAGTCCCAA                 | CCGATGAGTTGCCTCTGT                | NOD#NOR=DBA=BKS    |
| D11Gul2936       | 72161793        | TTTCCTACCTCTGTCTTTGC              | AACCCCAAGAAGACCAAGG               | NOD=NOR            |
| D11Gul2939       | 72200790        | ATTGGCAAGGTGACTTAAAGC             | TGGCCTCTATGACCTTCTCC              | NOD=NOR            |
| D11Jyh548        | 72236138        | TGCATGGGCACCTGCAC                 | TTCTTACCTCTCTCTCTTTT              | NOD#NOR=DBA=BKS    |
| D11Gul2952       | 72272318        | AAAAATTATTAGCCGGTGG               | ACATAGAGATTCAAGGCCAGC             | NOD=NOR            |
| D11Gul2966       | 72391529        | TCCATATCTCAATCTCAGCCC             | AGAGTGAGTTCGAGACAGCC              | NOD=NOR            |
| D11Gul2978       | 72489607        | GAGCATCTCTAGCCCTGC                | GCAAGTGGGTTAGTACACAG              | NOD=NOR            |
| D11Jyh582        | 72568517        | GGAAGATGGTTGACCCACAG              | CTCTACCTCTGCAAAAAGCA              | NOD#NOR            |
| D11Jyh598        | 72706982        | CCATTACCCCTAGCCTACATT             | GTTCAAGATCAGCTTGAAGCC             | NOD#NOR=DBA=BKS    |
| D11Gul3004       | 72732842        | GGTCCATCCTCAAGTTCG                | AGGAGTGCAGTAGCAAAAGCC             | NOD=NOR            |
| D11Gul3008       | 72760061        | CCCAACCCAACTGTAAGC                | GCAGAGGCACTCAGTCCC                | NOD#NOR            |
| D11Jyh608        | 72760171        | CCCAACACCAAACTGTAAGC              | G27GAGCCCAAGAAAACA                | NOD#NOR=DBA=BKS    |
| D11Gul3010       | 72774618        | TGGTGTGGCCTAGTAGGG                | CTTCACATCTCTGGCC                  | NOD=NOR            |
| D11Jyh611        | 72807577        | GGTTCATCTGTGCCATGGTA              | GTTCTAAGGGCAGCCAGG                | NOD#NOR=DBA=BKS    |
| D11Jyh616        | 72845534        | ATGATTTTGTGCTGTCCCA               | GAGGCGGAAGACTTAAGCTG              | NOD#NOR=DBA=BKS    |
| D11Jyh618        | 72848262        | CACAGAGAAACCCTGTCTCAA             | GCGCTGACTAATTTCTGTCA              | NOD#NOR=DBA=BKS    |
| D11Gul3023       | 72878798        | CCTCTGCAACCTGAGATGG               | GGAAGGGTTTGCAAGG                  | NOD#NOR            |
| D11Gul3025       | 72888744        | TGACTTCCAACCTGTACTGACC            | TCTGGAAGAGCAGTCAAGTC              | NOD=NOR            |
| D11Gul3027       | 72923007        | TGGTCAAACACAACTAGGC               | AGCAGGACTACCTCAGACACC             | NOD=NOR            |
| D11Gul3034       | 72971144        | AATTCATTGTCTCTGTGCTTCC            | GAAAGGACAGAGATGACCCC              | NOD=NOR            |
| D11Jyh629        | 72971220        | CTTGACAGATGCCATGATAA              | TTTTCTGATCTCCATGTGCAC             | NOD#NOR=DBA=BKS=B6 |
| D11Jyh630        | 72987019        | GCTGGTGTGTTGCTACGTGTTT            | TCCTCCCAAGGTACTTTTTG              | NOD#NOR=DBA=BKS=B6 |
| D11Jyh634        | 73015769        | CTGAGGATGAAGAATGCTGG              | TGAGGTGGGAAATGATTGAA              | NOD=NOR=BKS=DBA=B6 |
| D11Jyh638        | 73036973        | TGGCTTAGCTCTTCCCA                 | TGAAGCAGGAAGCAAATGAG              | NOD=NOR=BKS=DBA=B6 |
| D11Gul3046       | 73048023        | TCCCAACACTAGGGAGGC                | GAAACTGTGTGTAACCTGCTCC            | NOD=NOR            |
| D11Jyh641        | 73078225        | ACTATGGTGGCGTGGAGTTA              | TCGTCTTCTCAAATTTGGG               | NOD=NOR=BKS=DBA=B6 |
| D11Jyh642        | 73081519        | GCTCTACAGACACTTATCATTTGC          | GTGAGAGTCTTGTCTCAATGG             | NOD=NOR=BKS=DBA=B6 |
| D11Jyh643        | 73114922        | GGCCACTTAGATAAATAAGTAGC           | GTCATGCTGTGACATAGCC               | NOD=NOR=BKS=DBA=B6 |
| D11Jyh647        | 73145922        | TGATGAGTCCATTATCCAATCC            | TTCCCACTTACCCAATTCC               | NOD=NOR=BKS=DBA>B6 |
| D11Jyh351        | 73361480        | CCCAGTATCATTCCATGTTCC             | AGTGCAGAGCCTTCAATGC               | NOD=NOR=BKS=DBA=B6 |
| D11Jyh345        | 73391476        | CATGGAAGAAGGGATGGG                | GGATGATGTGTTGATATATGGC            | NOD=NOR=BKS=DBA=B6 |
| D11Jyh339        | 73472434        | TTTGCCAGTTTGTATCCCC               | TGAGCCAAACTTGCATCC                | NOD=NOR=BKS=DBA=B6 |
| D11Jyh338        | 73484995        | TCCAGAAAATCCTTAGAACAGG            | TGTTGGATAGAGGAAATATATGC           | NOD=NOR=BKS=DBA#B6 |
| D11Jyh336        | 73498558        | GTAAAGATATAATGAAGATGGATTG         | AGCCTTTCTACATGGACTCTGT            | NOD=NOR=BKS=DBA=B6 |
| D11Gul3089       | 73575682        | TGAGGACTCCAATATTCTCG              | TTGGATCACTTGAAGTTTCTCC            | NOD=NOR            |
| D11Jyh324        | 73649016        | CGTGCATGTGTGCTCTCTT               | TGGCCACGTGATTTAACATT              | NOD=NOR=BKS=DBA=B6 |
| D11Jyh318        | 73764434        | CACCTTCTCTTCTGCCCC                | TTCAAAGATATGGTCTATGTACC           | NOD=NOR=BKS=DBA#B6 |
| D11Gul3106       | 73782518        | GGGCTTGTGTGATATTCCC               | TGTAAGTCACTGTAATATGGTGC           | NOD=NOR            |
| D11Jyh313        | 73837393        | GTGCAGTTTTGAATGTGTTGC             | CAAATGATGCAAGATGTCAACC            | NOD=NOR=BKS=DBA=B6 |
| D11Jyh310        | 73917538        | CCATCTTCAAATAGGTCAAATTC           | CAGATTCCTTTAGTTAACCCAGG           | NOD=NOR=BKS=B6     |
| D11Jyh307        | 73974981        | AGTCTAACCAAGCTAGTGTCTCC           | ATCCCAGAAACCAACTGC                | NOD=NOR=BKS=DBA    |
| D11Jyh306        | 73988252        | GTCCCTTTTTTTCATTAATTTCTCT         | TTCCAAACGATGAACTGAACAAG           | NOD#NOR=DBA=BKS    |
| D11Gul3116       | 73988354        | GGCATCATGCTTCTAACC                | TTACATCATTTTCCCTGTCC              | NOD=NOR            |
| D11Gul3121       | 74027098        | AATAGAGGCTGCATGACTTCC             | TTTCTTTTCTCAAACCTTCC              | NOD=NOR            |
| D11Gul3123       | 74061465        | TGCCAATGGTTTAAACAAAGG             | AAAGTTAGTTCTTGTGCTGTGG            | NOD=NOR            |
| D11Gul3132       | 74144489        | ACTGCCTCATTTCATAACAAGG            | GTGCTGGGAATCAAACCC                | NOD=NOR            |
| D11Gul3172       | 74472911        | ACCTTCTGGCTTCTGAGAGC              | AATTCTCATAAAGTGCCGAGC             | NOD=NOR            |
| D11Gul3179       | 74503877        | TTTGTCACTGAGCTATTCCC              | AACAACAATGCACACCCG                | NOD=NOR            |
| D11Gul3189       | 74650116        | TTTTGGTTTTTCGAGACAGG              | AGAAAATGCCGGGCG                   | NOD=NOR            |
| D11Gul3198       | 74766048        | AAATAGGGCCAGCAATATGG              | GTTCAGAACAAAAAATAAGCG             | NOD=NOR            |
| D11Gul3215       | 74926448        | CTGGAACAATGCAGTGCC                | CATGCTAGTGGATGGGAGC               | NOD=NOR            |
| D11Gul3236       | 75095749        | CAACAAGGCTCCACCTCC                | CCTCAATTCAGATTACATCTCTCG          | NOD=NOR            |
| D11Gul3241       | 75140395        | ACTGTGGCCTTACAGATCTCC             | TCAGATCCTTCTCTTGG                 | NOD=NOR            |
| D11Gul3244       | 75180959        | GCAATAAAACCACTTGTGTGC             | GAACCATCTCTTCTCTTCC               | NOD=NOR            |
| D11Gul3246       | 75195563        | AAGTTTTCTCTTCTGTACGCC             | CTCTAATTCCTGACGTAATGG             | NOD=NOR            |
| D11Gul3255       | 75327195        | GATGGAGCTGCTGATGTAGC              | CCAAGTCTCTGCAAGAGC                | NOD=NOR            |
| D11Jyh164        | 75329443        | TTCCATGTACACACCATCACA             | TGTTTGGGATGTTGCAAAAT              | NOD#NOR            |
| D11Gul3262       | 75388935        | AGCAAACCCTGTCTCAAAAAACC           | AGCAACAATGCTCAAGGC                | NOD=NOR            |
| D11Gul3265       | 75418935        | GCTTTCATCAGGCCTTGG                | TGGCTTCTCTTTATCAAACC              | NOD=NOR            |
| D11Gul3269       | 75470261        | TCAAAGCTAACCCAAGTTTCC             | GGTTCAGTCTCCAGCACC                | NOD=NOR            |
| D11Gul3276       | 75524213        | CAGAGGCTGTCGTTGTGG                | ACCCCTCTTCTGTCCCC                 | NOD#NOR            |
| D11Jyh134        | 75554436        | CAGGAGATGCAACCCAC                 | TCTCTCCAGCCCTCATTTTT              | NOD#NOR=DBA=BKS    |
| D11Gul3307       | 75689058        | GGATTTACAGACAGCTGGAGC             | AGACAAGGATGCCATGGG                | NOD=NOR            |
| D11Gul3325       | 75763372        | AGGAAGCTGTGAGGCAGG                | AGCTCTTCTCCACTAGCC                | NOD=NOR            |
| D11Gul3329       | 75784798        | AGAAGTATGAGTGAGGCAGCC             | CAAGCCATGATGTAGTAGAGG             | NOD=NOR            |
| D11Jyh107        | 75860300        | GCCCAGCTCAAACCCATA                | CTATAGCCACAGGGCACAAA              | NOD#NOR=DBA=BKS    |
| D11Jyh104        | 75961098        | CAAGCATGTGCCTGGCT                 | CTCTGCTCTCTCTTTTGTAT              | NOD#NOR            |
| D11Jyh96         | 76227476        | AATCTCTTACCCACCCCT                | TGAAAGTGTGAGCATGCGT               | NOD#NOR            |
| <b>D11Mit322</b> | <b>76304982</b> | <b>TGCTCTGCATACCCCTTTG</b>        | <b>GATTAAGTACAGGCAACTGCAGG</b>    | <b>NOD#NOR</b>     |

|                   |                 |                               |                              |                    |
|-------------------|-----------------|-------------------------------|------------------------------|--------------------|
| D11Jyh93          | 76341433        | CTGGAAGCCTGTCACTTGG           | ACACATCCCTGTATGCAAGG         | NOD=NOR=BKS=DBA=B6 |
| D11Jyh86          | 76471657        | TGTTGTGACAGGTGGAGTGTAT        | TCTTCTGGTCTCTTCAGGCAT        | NOD=NOR=BKS=DBA=B6 |
| D11Jyh85          | 76533356        | ACCACACTGGCCCTGC              | TTCCTGAAAGGTGTCTTCTGACC      | NOD=NOR=BKS=DBA=B6 |
| D11Jyh83          | 76611749        | GATCTTCAATGGAACAGCTTGT        | TCCCCAGAACCTTAAACCTC         | NOD=NOR=BKS=DBA=B6 |
| D11Jyh82          | 76622757        | CCAGAGCATTGGGAAAGC            | ACTGCAACCAGATCTTGGG          | NOD=NOR=BKS=DBA=B6 |
| D11Jyh81          | 76656103        | AGTGGAACAGTAAGTAAGAGGC        | CGGCCAAGATTTAGTCAAAT         | NOD=NOR=BKS=DBA=B6 |
| D11Jyh80          | 76670434        | TACACATTCTGGGCTTCGC           | TGCAGTGGACTCTCCCG            | NOD=NOR=BKS=DBA=B6 |
| D11Jyh79          | 76693500        | TAGACCCAGTTTCTGAGTCAAACCTA    | TAACACACTGCCTCTGAATGAA       | NOD=NOR=BKS=DBA=B6 |
| D11Jyh68          | 77045642        | CACACCAGTCTTCAAAGCTTG         | CGGATTTCTGAGTTCGAGG          | NOD=NOR=BKS=DBA=B6 |
| <b>D11Bhm149</b>  | <b>77408880</b> | <b>CTAGTATCTGTTTTTCTTCCCT</b> | <b>ACAAACAAAAGCCAAAACCCT</b> | <b>NOD=NOR=BKS</b> |
| D11Jyh57          | 77414820        | CAACCAAGGAAAGAACTTTTACC       | AATCCACTGCTTCTGCC            | NOD=NOR=BKS=DBA=B6 |
| D11Jyh55          | 77451939        | CCCTGGAAACCCACTTGG            | TGGTGGTTATCACTTGTGTGTG       | NOD=NOR=BKS=DBA=B6 |
| D11Jyh53          | 77504183        | TCACCAACTACCCACTGGC           | GGTCCCTTCAATGCC              | NOD=NOR=BKS=DBA=B6 |
| D11Jyh50          | 77557429        | TCCCCCTTAGACTGAATTTGG         | CTAGGGCACTTTATACCCTTC        | NOD=NOR=BKS=DBA=B6 |
| D11Jyh46          | 77686785        | CTCCTCCCTCACCCCTGG            | TTTTGTGGTCTCAGTTGGG          | NOD=NOR=BKS=DBA=B6 |
| D11Jyh45          | 77706471        | TTGAGGACTGTAAGTCAAAGGG        | TTGTGGCCATAGCAACG            | NOD=NOR=BKS=DBA=B6 |
| D11Jyh35          | 78174712        | GGCTCACAGCCATTTAACC           | TGGACCTACTAAGGAAGCCC         | NOD=NOR=BKS=DBA=B6 |
| D11Jyh29          | 78454961        | GAGACCTGTCTAAAATAAATAGGC      | GAGTTACAGAGGATGACTTCAGC      | NOD=NOR=BKS=DBA=B6 |
| D11Jyh19          | 78665045        | GCTGAGCCATAGCCCG              | TCCGATATACACCTGACTTATTAGC    | NOD=NOR=BKS=DBA=B6 |
| D11Jyh17          | 78806277        | AGGAACCATTTGAGCTGTGC          | TTCTCCACATGGTTAGC            | NOD=NOR=BKS=DBA=B6 |
| D11Jyh15          | 78843686        | TTCTCTAGCATTCTCTGTATGC        | GTTGGAATTAAGGCTATCC          | NOD=NOR=BKS=DBA=B6 |
| D11Jyh13          | 78877174        | CGGCTAAATTCATCCCC             | TGAGCTTTCATACCATGATGC        | NOD=NOR=BKS=DBA=B6 |
| D11Jyh11          | 78910988        | CAGAGTTCGGTTCCACAGC           | AAAGTCAGCCCAAAGCTCC          | NOD=NOR=BKS=DBA=B6 |
| D11Jyh10          | 78921948        | GCATTTGTGAGCTCCTGAAC          | TGCACAGCAAAAACCTCG           | NOD=NOR            |
| D11Jyh1219        | 79692533        | CTCTGGAGGAAGGTTTCAATG         | CTTCTGCTTCCATATGCTCAG        | NOD=NOR            |
| D11Jyh1216        | 79703226        | TGGTGAGCGGCATTCC              | GAACCACTACACAAAGCTGTCC       | NOD=NOR=BKS=DBA=B6 |
| D11Jyh1208        | 79799366        | GTCTGCATTGACTCCATAGTACC       | AAGATCTGCTGAAGTGAAGTGG       | NOD=NOR=BKS=DBA=B6 |
| D11Jyh1204        | 79834404        | ATGCCTAGCTTTCAATTCTCC         | AGTTCACAGGATACCCAGGG         | NOD=NOR=BKS=DBA=B6 |
| <i>D11Jyh1196</i> | 79878440        | CACATGGGTTTCTATCCCG           | ACACTTCCGTCACAACAGG          | NOD=NOR=BKS#B6#DBA |
| <i>D11Jyh1188</i> | 79940561        | CACATGGCCCAACTACAGTC          | TGGAACCTGCCCTTTGGAC          | NOD=NOR=BKS#B6#DBA |
| D11Jyh1184        | 79964582        | TGAGAAAAACCCAGTGTC            | TCAGGAACATAAGTGTCTAAAGG      | NOD=NOR=BKS#B6#DBA |
| <i>D11Jyh1178</i> | 80007532        | TCAAAAGTGGAGGTGAGTGG          | TAAGGCATGGTGTGAGTGC          | NOD=NOR=BKS#B6#DBA |
| <i>D11Jyh1172</i> | 80030639        | ACACCCTCTGCTTGGAGC            | TGCCGTGTTTGTGTTTTCC          | NOD=NOR=BKS#B6#DBA |
| D11Jyh1163        | 80058077        | CCAAGGCTGCCGAGC               | CCTCCAAGTGAAGATGTAAGG        | NOD=NOR=BKS#B6#DBA |
| D11Jyh1154        | 80094529        | TTAGGCCCATACAAGCC             | AGCAAATACACTGGCCCC           | NOD=NOR=BKS#B6#DBA |
| <i>D11Jyh1145</i> | 80173138        | CCCGGCCAGAGTAAGT              | CTCACTACAGTGTGACCTGGTT       | NOD=NOR=BKS#B6#DBA |
| D11Jyh1140        | 80229804        | AAAAGACAAAGCAGCCATGG          | TTAGCTCTGCCACTCTGTGG         | NOD=NOR=BKS#B6#DBA |
| D11Jyh1133        | 80274151        | CTCCAAGTATTTTATGTGGAGAGC      | CCCCATAAGGGAATTTGTC          | NOD=NOR=BKS#B6#DBA |
| D11Jyh1126        | 80353263        | TCACGCACACGAACACG             | GTAACCTCTCCAGCAAAGCC         | NOD=NOR=BKS#B6#DBA |
| <i>D11Jyh1116</i> | 80438744        | CATGTGTGCCCTGCGTACA           | GAGAAACCTGCCTCGAA            | NOD=NOR=BKS#B6#DBA |
| <i>D11Jyh1113</i> | 80474955        | GTGTTGGCTTCTATGTTGACG         | CCCAGATTCTAGGCCAGC           | NOD=NOR=BKS#B6#DBA |
| D11Jyh1100        | 80540639        | ACTATTGGGATGGCCAGG            | CATCTCCATCCACTCC             | NOD=NOR=BKS#B6#DBA |
| D11Jyh1090        | 80568199        | GGACCCCTGAGATGGCC             | ACTGGGTTCTCAGCAGCC           | NOD=NOR=BKS#B6#DBA |
| D11Jyh1081        | 80608437        | TCCTTGGTGTGATCCACATCT         | GGCTAGGCTCTGGAAGACA          | NOD=NOR=BKS#B6#DBA |
| D11Jyh1076        | 80652862        | CAAGGTGGCTGGAACCG             | CTAAGGCACCTACTGAAGATGG       | NOD=NOR=BKS#B6#DBA |
| D11Jyh1067        | 80667421        | CTCTGGCCACACATGGG             | CTAGAGTGGTGGATGCCTACC        | NOD=NOR=BKS#B6#DBA |
| D11Jyh1059        | 80707276        | AGTTCGTGCTACTGCTCC            | GACTCCTCCCCACATTGG           | NOD=NOR=BKS#B6#DBA |
| D11Jyh1029        | 80833865        | GGGTTGGGACATGAGGG             | AAGGTGGAGGGCAATGG            | NOD=NOR=BKS#B6#DBA |
| D11Jyh1007        | 80939802        | CCCCAAGCTCAATCAGATCT          | CCTGGCTGTGAATTTAGAGTTG       | NOD=NOR=BKS#B6#DBA |
| D11Jyh997         | 80987207        | GACTTGTCTTCCCCTTGGC           | TCATGTCTGGGACCCACC           | NOD=NOR=BKS#B6#DBA |
| D11Jyh987         | 81054376        | TCTTCATGGTTAAGAATAGAAAAGC     | CCTCTGGTGTCCATTGTCC          | NOD=NOR=BKS#B6#DBA |
| D11Jyh959         | 81196951        | TCACAGCAATAACTTTACTTGGC       | GGCATTGTACACAGCAGG           | NOD=NOR=BKS#B6#DBA |
| D11Jyh942         | 81346690        | TCTGTCTGGAAGTTTCAATGGG        | GTGCAGGCAAGTCCAGC            | NOD=NOR=BKS#B6#DBA |
| D11Jyh931         | 81401360        | TGACGCTTCCCTGTAACCTGC         | CATTTCTGCTGCTTTTTGT          | NOD=NOR=BKS#B6#DBA |
| D11Jyh928         | 81435091        | CGAGCACAGCAGAAAAGTCC          | GCATAGCTACCATGTTCTCAGC       | NOD=NOR=BKS#B6#DBA |
| D11Jyh922         | 81456008        | TGAGCTTCAAGTTTGGCC            | TGAAATATCTTCCATGCAATCC       | NOD=NOR=BKS#B6#DBA |
| D11Jyh919         | 81495508        | GATCTCAACTCTTAACACATATGC      | AACAATGCAAGCAGAGATGC         | NOD=NOR=BKS#B6#DBA |
| D11Jyh915         | 81506341        | ACAGGGCAGCTCACAAAC            | TCTCCTCCCGACTTGC             | NOD=NOR=BKS#B6#DBA |
| <b>D11Mit33</b>   | <b>81507744</b> | <b>TAATGGCTCTGCAGTGATGC</b>   | <b>GAGGTTGTCCCCAGGTAACC</b>  | <b>NOD=NOR#BKS</b> |
